# Supplementary material
Source: PubMed Central journal article supplement (PMC8341787)
Supplement: CB-002-D0CB00208A-s001.pdf [file CB-002-D0CB00208A-s001.pdf]

## **Supplementary information:**

### **Natural Trojan horse inhibitors of aminoacyl-tRNA synthetases**

Dmitrii Y. Travin, Konstantin Severinov and Svetlana Dubiley

1. **Figure S1** *In vitro* biosynthesis of selected McC-like peptidyl-nucleotides.
2. **Figure S2.** Chemical structures of agrocin 434 (proposed), agrocin 108 and ascorbate-2-phosphate.
3. **Table S1** The characteristics of selected *mcc*-like BGCs
4. **Supplementary references**

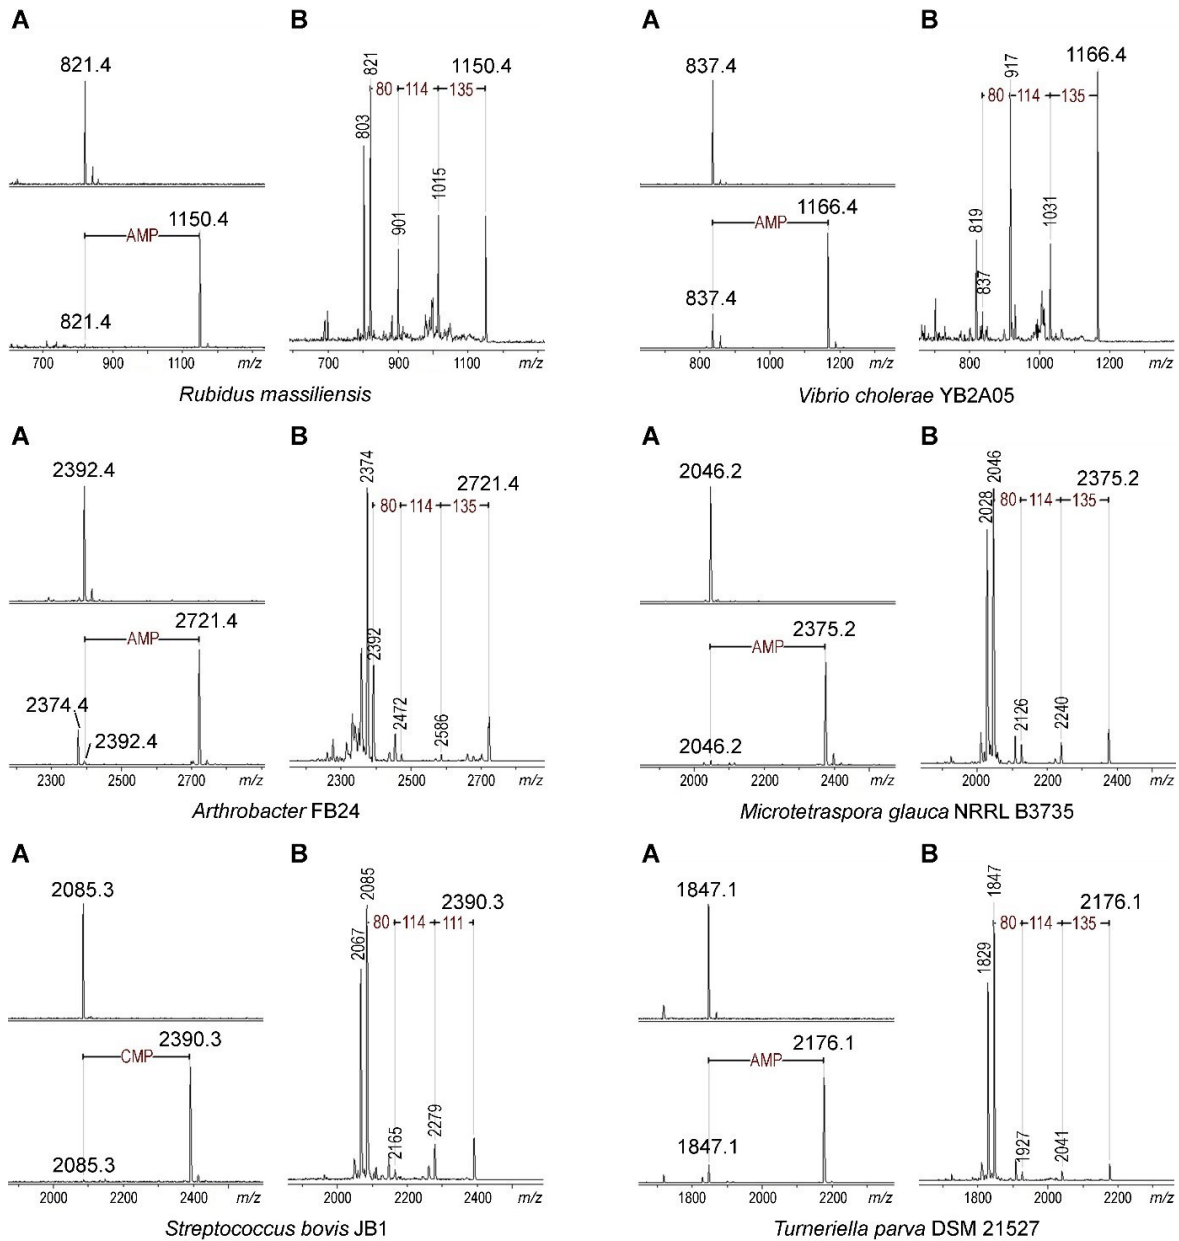

**Figure S1. *In vitro* biosynthesis of selected McC-like peptidyl-nucleotides.**

(A) MALDI MS spectra of the reaction products of chemically synthesized MccA peptides (sequences are listed in **Table S1**) combined with their cognate recombinant MccB homologs in the absence (top) and the presence (bottom) of NTPs. Reaction conditions were as described in [1]. (B) MALDI-ToF MS/MS analysis of the modified peptides. Differences in masses between the parental ions and the first daughter ions equal to 135 and 111 Da correspond to adenine and cytosine nucleobase, respectively. Mass differences in 114 and 80 Da between the daughter ions match the masses of ribose and phosphate moiety, respectively.

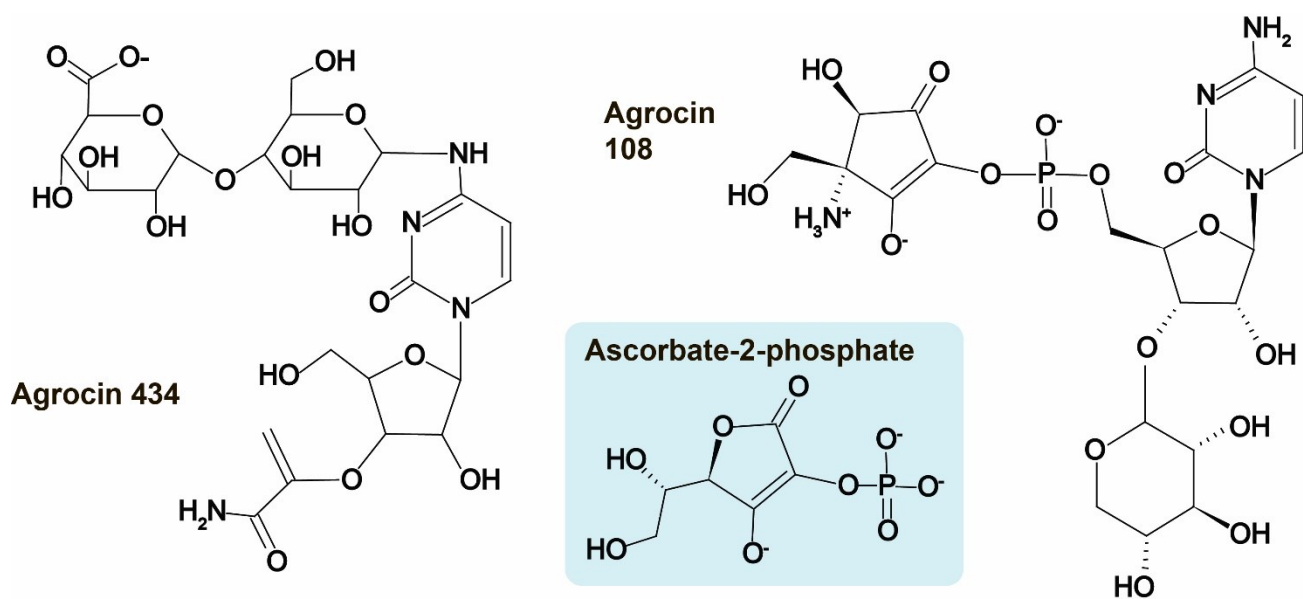

**Figure S2. Chemical structures of agrocin 434 (proposed), agrocin 108 and ascorbate-2-phosphate.**

**Table S1. The characteristics of selected *mcc*-like BGCs**

| Group # | Organism                                            | Protein ID for MccB                | MccA length | MccA sequence                                                                                 | Reference  |
|---------|-----------------------------------------------------|------------------------------------|-------------|-----------------------------------------------------------------------------------------------|------------|
| 1       | <i>Helicobacter pylori</i> HPP12 and pHPM8 plasmids | WP_001149949.1                     | 7           | MKLSYRN*                                                                                      | [1]        |
| 1       | <i>Lactobacillus johnsonii</i> NCC 533              | WP_011161263.1                     | 7           | MHRIMKN*                                                                                      | [1]        |
| 1       | <i>Bartonella washoensis</i> Sb944nv                | WP_006922866.1                     | 7           | MDHIGFN*                                                                                      | [1]        |
| 1       | <i>Streptococcus thermophilus</i> LMD-9             | WP_011227610.1                     | 7           | MKGTILN*                                                                                      | [1]        |
| 2       | <i>Rubidus massiliensis</i>                         | CDZ81242.1                         | 7           | MNTITKN*                                                                                      | This study |
| 3       | <i>Escherichia coli</i> pMccC7 plasmid              | WP_012262109.1                     | 7           | MRTGNAN*                                                                                      | [2]        |
| 4       | <i>Dickeya sp.</i> NCPPB 569                        | WP_042873199.1                     | 7           | MISVSSN*                                                                                      |            |
| 5       | <i>Turneriella parva</i> DSM 21527                  | WP_014804506.1                     | 17          | MKIEKTAKKITRTGGAN*                                                                            | This study |
| 6       | <i>Bacillus subtilis</i> RU36A                      | WP_076458000.1                     | 22          | MKVKKIKKKKPIKIGFDGPV MN*                                                                      |            |
| 7       | <i>Marinomonas sp.</i> QM202                        | TBR37457.1                         | 7           | MIARLLN*                                                                                      |            |
| 8       | <i>Enterobacter cloacae</i> NFPP41                  | PPL04129.1                         | 31          | MTVKVASRIKSNKVQTVTMA NLKVVVETASN*                                                             |            |
| 9       | <i>Arthrobacter sp.</i> FB24                        | WP_156810615.1                     | 19          | MLKLRKRLTKRRSKLNFVFN*                                                                         | This study |
| 10      | <i>Microtetraspora glauca</i> NRRL B-3735           | IH35_RS0121550                     | 19          | MLKIIKVVTAKAVSGRAFN*                                                                          | This study |
| 11      | <i>Vibrio cholerae</i> YB6A06                       | WP_057557102.1                     | 8           | MNAFAVAN*                                                                                     | This study |
| 12      | <i>Hyalangium minutum</i> DSM 14724                 | WP_044187426.1 ;<br>WP_157231975.1 | 36,46       | MNDKATIEIKKDEKKAEPKK VVVVKTSIKAGPAAFN* ;<br>MNEKTAQESQKTESPKAETP AKKAVIVKTRIKAGPGGGGL VHPIAN* | [3]        |
| 13      | <i>Synechococcus</i>                                | WP_156783136.1                     | 56          | MTQPNDRQLSNEELSDVAAG                                                                          | [1][4]     |

|    |                                            |                |    |                                                     |            |
|----|--------------------------------------------|----------------|----|-----------------------------------------------------|------------|
|    | <i>sp. CC9605</i>                          |                |    | LFRRTFFKPRTSRKTLLQPKR<br>LDKVAKNQLWADMMN*           |            |
| 14 | <i>Bacillus amyloliquefaciens</i> DSM 7    | WP_013352374.1 | 19 | MLKIRKVKIVRAQNGHYTN*                                | [5]        |
| 15 | <i>Yersinia pseudotuberculosis</i> IP32953 | WP_011192338.1 | 42 | MHQSEIKLTKRLKIKRVDVN<br>KVKEQQKKVLECGAATCGG<br>GSN* | [1][6]     |
| 16 | <i>Lysinibacillus sp. YR326</i>            | WP_134026785.1 | 19 | MLKIRKVSQVKGFSPLPVFN*                               |            |
| 17 | <i>Staphylococcus delphini</i> 14S03318-1  | WP_096546674.1 | 19 | MLEIQEVKEIEGRSAHVSN*                                |            |
| 18 | <i>Nocardia vaccinii</i> NBRC 15922        | WP_067901914.1 | 21 | MKIVLKLKRIVRGAGPIIVSN*                              |            |
| 19 | <i>Nocardiopsis sp. JB363</i>              | WP_160049295.1 | 21 | MRRISMTPVRKVKGSTTVVA<br>N*                          |            |
| 20 | <i>Streptococcus equinus</i> JB1           | WP_039696479.1 | 19 | MLKIKKVKVVAASSTRVLN*                                | This study |

### Supplementary references

- [1] O. Bantysh, M. Serebryakova, K. S. Makarova, S. Dubiley, K. A. Datsenko, and K. Severinov, "Enzymatic synthesis of bioinformatically predicted microcin C-like compounds encoded by diverse bacteria.," *MBio*, vol. 5, no. 3, pp. e01059-14, May 2014.
- [2] R. F. Roush, E. M. Nolan, F. Löhner, and C. T. Walsh, "Maturation of an Escherichia coli ribosomal peptide antibiotic by ATP-consuming N-P bond formation in microcin C7.," *J. Am. Chem. Soc.*, vol. 130, no. 11, pp. 3603–9, Mar. 2008.
- [3] E. Yagmurov *et al.*, "Histidine-Triad Hydrolases Provide Resistance to Peptide-Nucleotide Antibiotics.," *MBio*, vol. 11, no. 2, Apr. 2020.
- [4] J. Paz-Yepes, B. Brahamsha, and B. Palenik, "Role of a microcin-C-like biosynthetic gene cluster in allelopathic interactions in marine Synechococcus.," *Proc. Natl. Acad. Sci. U. S. A.*, vol. 110, no. 29, pp. 12030–5, Jul. 2013.
- [5] M. Serebryakova *et al.*, "A Trojan-Horse Peptide-Carboxymethyl-Cytidine Antibiotic from *Bacillus amyloliquefaciens*.," *J. Am. Chem. Soc.*, vol. 138, no. 48, pp. 15690–15698, 2016.
- [6] D. Tsubulskaia *et al.*, "The Product of *Yersinia pseudotuberculosis* mcc Operon Is a Peptide-Cytidine Antibiotic Activated Inside Producing Cells by the TldD/E Protease.," *J. Am. Chem. Soc.*, vol. 139, no. 45, pp. 16178–16187, 2017.
